# Supplementary material for: On-receptor computing with classical associative learning in semiconductor oxide memristors
Source: Royal Society of Chemistry journal article supplement (doi:10.1039/d4nr02132k), 2024-01-01
Supplement: d4nr02132k1.pdf [file d4nr02132k1.pdf]

## Supplementary materials

### **On-receptor computing with classical associative learning in semiconductor oxide memristors**

Dongyeol Ju,<sup>a</sup> Jungwoo Lee,<sup>a</sup> Sungjun Kim<sup>a</sup>

<sup>a</sup> Division of Electronics and Electrical Engineering, Dongguk University, Seoul 04620, South Korea

E-mail: [sungjun@dongguk.edu](mailto:sungjun@dongguk.edu)

**Table. S1** The comparison of Pt/IGZO/SnO<sub>x</sub>/TiN device's nociceptive and synaptic behavior compared to previous works.

| No | Structure                         | Nociceptive function                                                | Synaptic function                                   | Multifunctional behavior                       | Reference |
|----|-----------------------------------|---------------------------------------------------------------------|-----------------------------------------------------|------------------------------------------------|-----------|
| 1  | Pt/SiO <sub>x</sub> :Ag/<br>Ag/Pt | Threshold, no-adaptation,<br>relaxation, sensitization              | X                                                   | X                                              | [S1]      |
| 2  | Pt/HfO <sub>2</sub> /Ti<br>N      | Threshold, relaxation,<br>sensitization                             | X                                                   | X                                              | [S2]      |
| 3  | CZO/ITO/gl<br>ass                 | Threshold, no-adaptation,<br>relaxation, sensitization,<br>recovery | Potentialion and<br>depression                      | X                                              | [S3]      |
| 4  | Ag/SiC/Pt                         | Threshold, no-adaptation,<br>relaxation                             | STDP                                                | X                                              | [S4]      |
| 5  | s-ITO/c-<br>ITO                   | Threshold, no-adaptation,<br>relaxation, sensitization              | X                                                   | X                                              | [S5]      |
| 6  | ITO/TiO <sub>x</sub> /Ti<br>N     | Threshold, no-adaptation,<br>relaxation, sensitization              | X                                                   | X                                              | [S6]      |
| 7  | Au/MoS <sub>2</sub> /A<br>g       | Threshold, no-adaptation,<br>relaxation, sensitization              | X                                                   | X                                              | [S7]      |
| 8  | Au/CsPbBr <sub>3</sub><br>/ITO    | X                                                                   | Potentialion and<br>depression, PPF, STM<br>and LTM | X                                              | [S8]      |
| 9  | Ti/TaO <sub>x</sub> /IT<br>O      | X                                                                   | Potentialion and<br>depression, STDP                | X                                              | [S9]      |
| 10 | Ag/TiO <sub>2</sub> /Pt           | Threshold, no-adaptation,<br>relaxation, sensitization              | STM and LTM,<br>SRDP, STDP                          | X                                              | [S10]     |
| 11 | Pt/IGZO/Sn<br>O <sub>x</sub> /TiN | Threshold, no-adaptation,<br>relaxation, sensitization,<br>recovery | Learning and<br>forgetting, STM and<br>LTM, SRDP    | Pavlovian conditioning,<br>reservoir computing | This work |

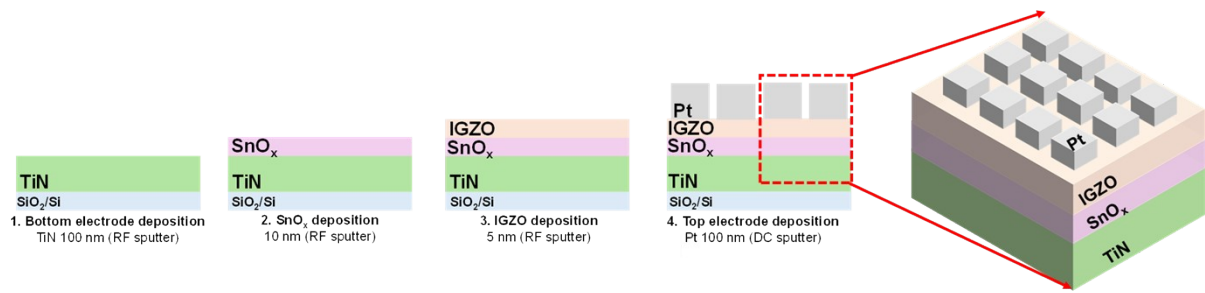

Fig. S1 Fabrication process of the Pt/IGZO/SnO<sub>x</sub>/TiN memristor.

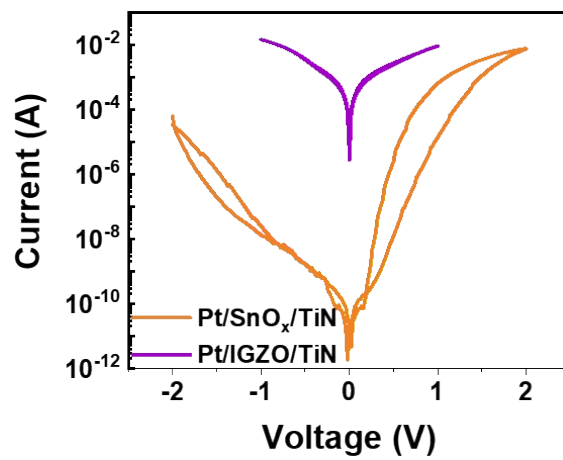

Fig. S2 The I-V curves of Pt/SnO<sub>x</sub>/TiN and Pt/IGZO/TiN devices.

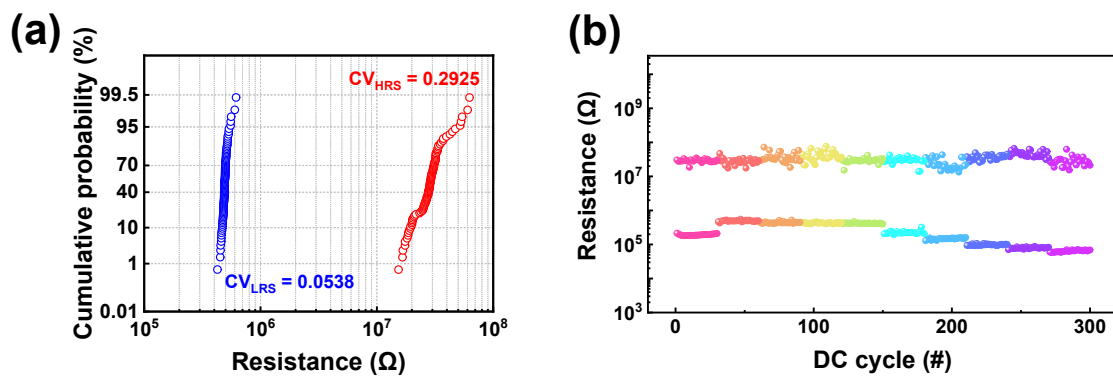

Fig. S3 (a) Coefficient of variation of 100 DC endurance cycles of the Pt/IGZO/SnO<sub>x</sub>/TiN memristor. (b) Uniformity of endurance properties over 10 different randomly selected Pt/IGZO/SnO<sub>x</sub>/TiN devices, each showcasing 30 cycles.

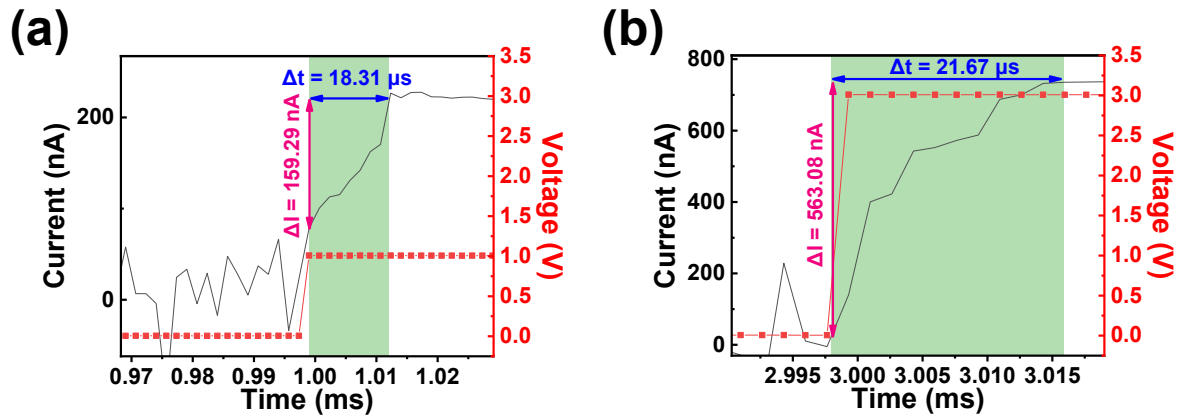

**Fig. S4** Energy consumption of the Pt/IGZO/SnO<sub>x</sub>/TiN device. (a) Energy consumption of read process, resulting 2.92 pJ. (b) Energy consumption of write process, resulting 36.6 pJ.

**Table. S2** The key parameter comparison of Pt/IGZO/SnO<sub>x</sub>/TiN device compared to previous works.

| No | Structure                                              | Switching film thickness | Endurance         | Operating current | Power consumption | Switching type | Memory storing function | Reference |
|----|--------------------------------------------------------|--------------------------|-------------------|-------------------|-------------------|----------------|-------------------------|-----------|
| 1  | ITO/MoS <sub>2</sub> /EGaIn                            | 25 nm-                   | > 10 <sup>3</sup> | < 0.1 A           | 32.9 pJ           | Digital        | Non-volatile            | [S11]     |
| 2  | VO <sub>x</sub> /SiO <sub>2</sub> /Si                  | 140 / 2.1 nm             | N/A               | N/A               | 0.53 pJ           | Digital        | Non-volatile            | [S12]     |
| 3  | Au/MoS <sub>2</sub> /Au                                | N/A                      | > 400             | < 1 mA            | 200 pJ            | Digital        | Non-volatile            | [S13]     |
| 4  | Pt/ZrO <sub>2</sub> /IGZO/TiN                          | 3 / 5 nm                 | > 100             | < 4 mA            | 4 μJ              | Digital        | Non-volatile            | [S14]     |
| 5  | Ag/SiC/Pt                                              | 10 nm                    | > 100             | < 10 μA           | 32.25 pJ          | Digital        | Non-volatile            | [S4]      |
| 6  | Ag/MoS <sub>2</sub> /Pt                                | 30 nm                    | > 10 <sup>6</sup> | N/A               | 400 nJ            | Digital        | Non-volatile            | [S15]     |
| 7  | Ag/Ti <sub>3</sub> C <sub>2</sub> T <sub>x</sub> NS/Pt | N/A                      | N/A               | < 50 μA           | 18.82 nJ          | Digital        | Volatile                | [S16]     |

|    |                                            |           |                   |          |         |         |              |           |
|----|--------------------------------------------|-----------|-------------------|----------|---------|---------|--------------|-----------|
| 8  | TiN/SiO <sub>2</sub> /TaO <sub>x</sub> /Pt | 25 / 2 nm | N/A               | < 1 mA   | N/A     | Digital | Non-volatile | [S17]     |
| 9  | Ti/TaO <sub>x</sub> /ITO                   | 10 nm     | > 10 <sup>3</sup> | < 10 mA  | N/A     | Digital | Non-volatile | [S9]      |
| 10 | Pt/IGZO/SnO <sub>x</sub> /TiN              | 10 / 5 nm | > 100             | < 500 μA | 36.6 pJ | Analog  | Volatile     | This work |

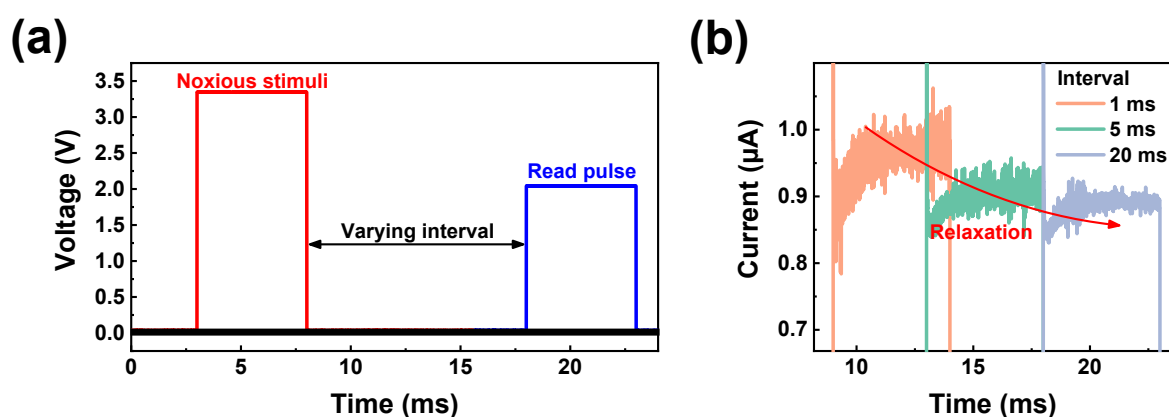

**Fig. S5** (a) Pulse schematic utilized to gain the relaxation properties of the Pt/IGZO/SnO<sub>x</sub>/TiN device. (b) Current response at different relaxation periods.

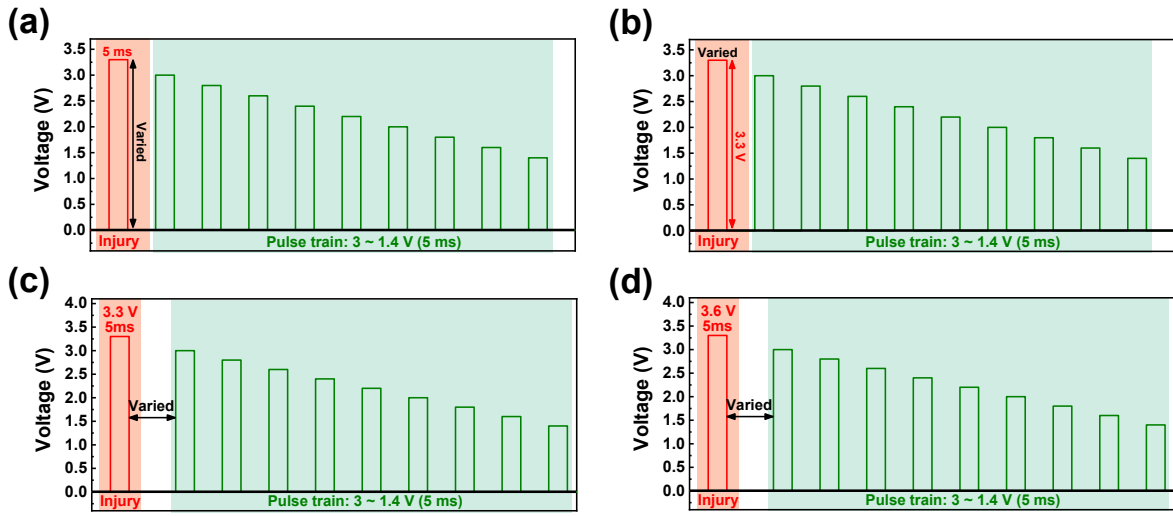

**Fig. S6** Pulse schematic utilized to gain sensitization properties of the Pt/IGZO/SnO<sub>x</sub>/TiN device, earned through differing (a) injury amplitude, and (b) injury width. Pulse schematic utilized to observe recovery under injury of (c) 3.3 V, and (d) 3.6 V.

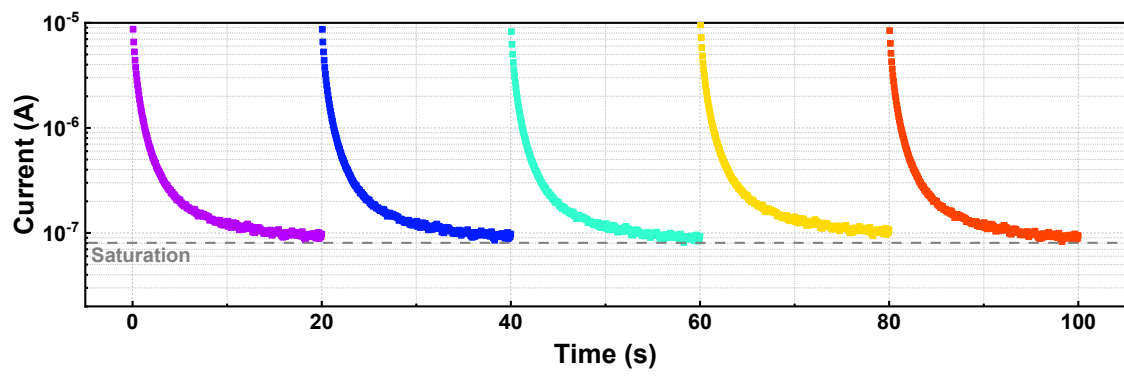

Fig. S7 Repeated LTM transition behavior under application of 50 set pulses.

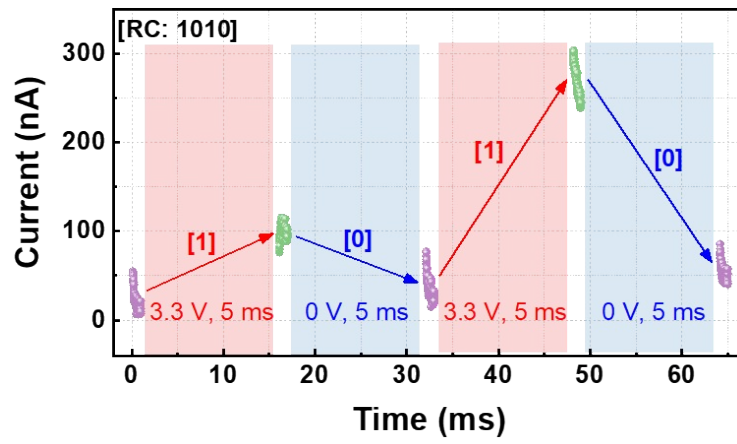

**Fig. S8** Schematic illustration of current response of 4-bit reservoir computing following the use of a [1010] pulse.



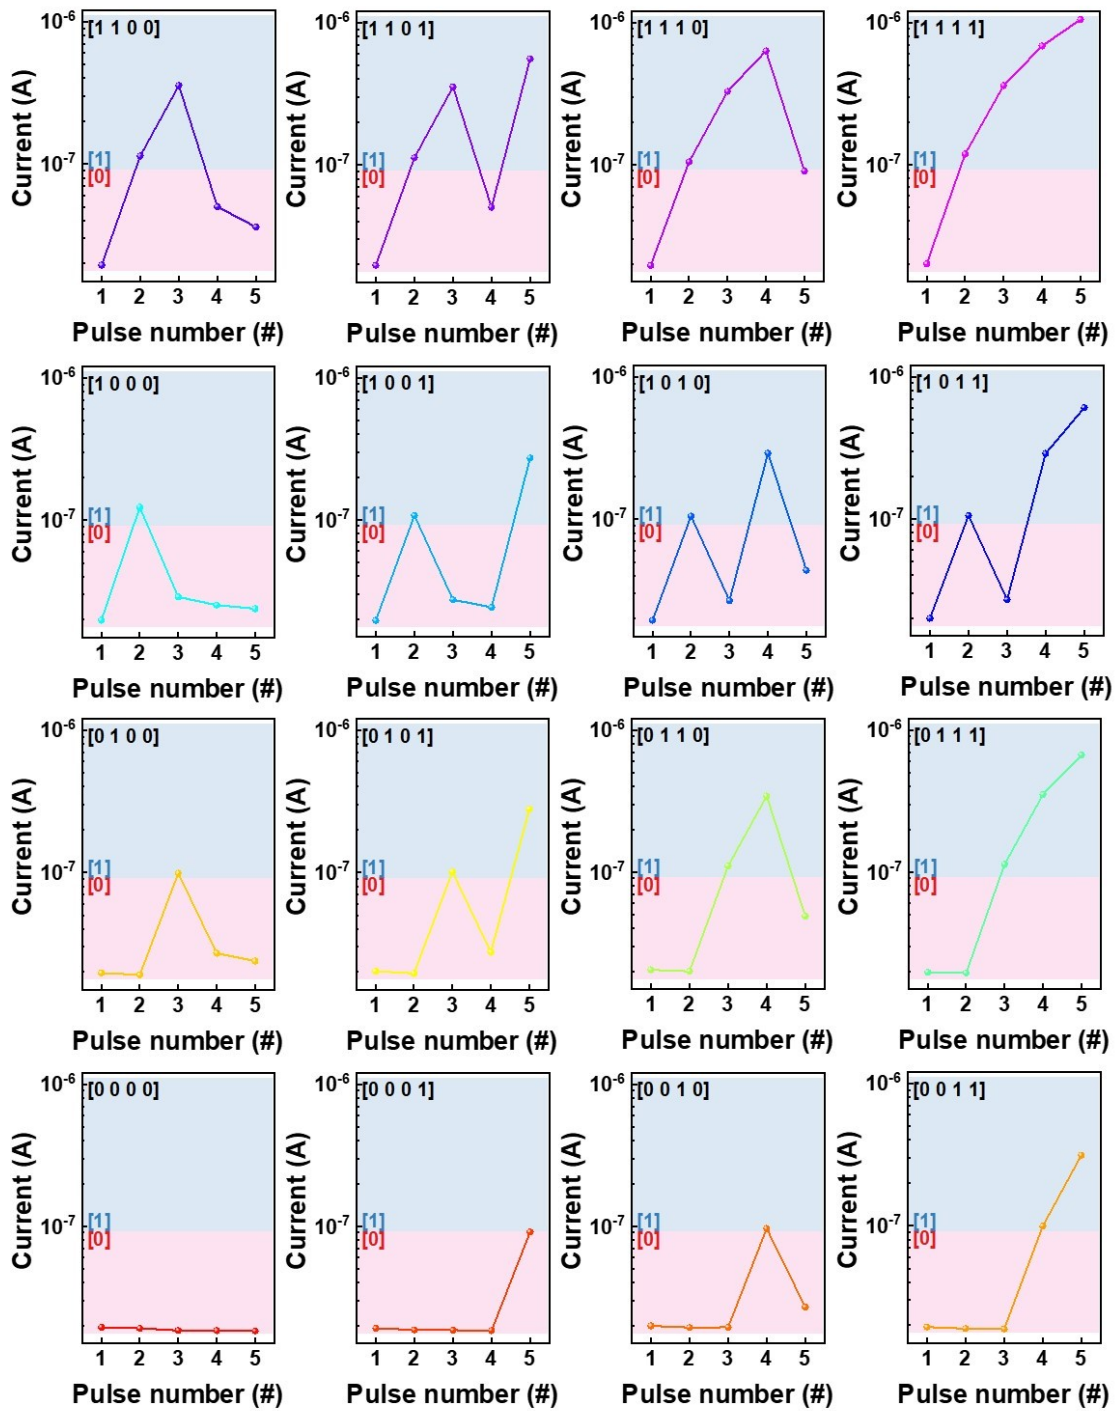

Fig. S9 Sixteen different reservoir states of the 4-bit reservoir computing based on Pt/IGZO/SnO<sub>x</sub>/TiN device.

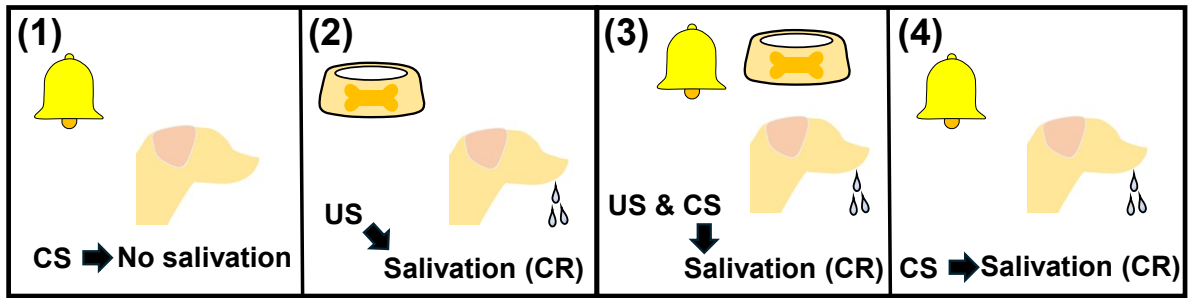

Fig. S10 Schematic illustration of Pavlovian conditioning process.

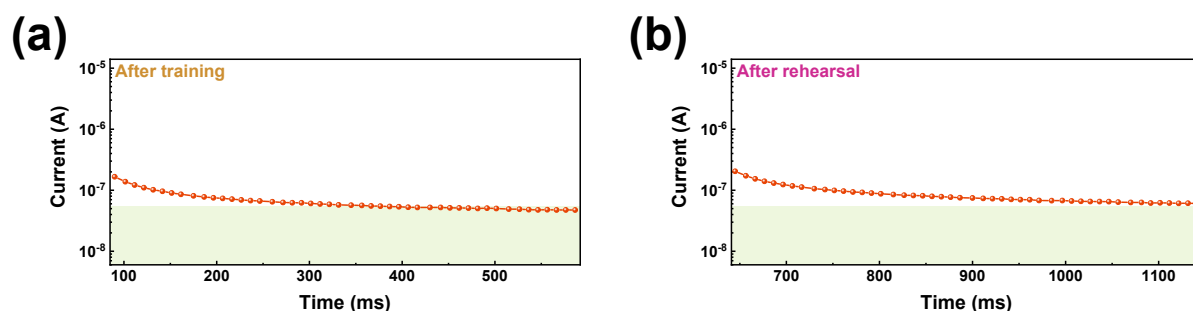

**Fig. S11** Facilitation of current observed from Pavlovian conditioning for 500 s after (a) training, and (b) rehearsal.

## References

- [S1] J. H. Yoon, Z. Wang, K. M. Kim, H. Wu, V. Ravichandran, Q. Xia, C. S. Hwang and J. J. Yang, *Nat. Commun.*, 2018, 9, 417.
- [S2] Y. Kim, Y. J. Kwon, D. E. Kwon, K. J. Yoon, J. H. Yoon, S. Yoo, H. J. Kim, T. H. Park, J. W. Han, K. M. Kim and C. S. Hwang, *Adv. Mater.*, 2018, 30, 1704320.
- [S3] R. Mandal, A. Mandal and T. Som, *Appl. Mater. Today*, 2024, 37, 102103.
- [S4] L. Liu, J. Zhao, G. Cao, S. Zheng and X. Yan, *Adv. Mater. Technol.*, 2021, 6, 2100373.
- [S5] X. Han, Y. Xu, B. Sun, R. Xu, J. Xu, W. Hong, Z. Fu, H. Zhu, X. Sun, J. Chang and K. Qian, *Appl. Phys. Lett.*, 2022, 120, 094103.
- [S6] Y. Zhang, F. Wang, X. Shan, X. Lin, X. Zhao, Q. Zhou, K. Shan, Z. Ma, G. Chen, X. Wang, D. Huang and K. Zhang, *Mater. Sci. Eng. B-Adv. Funct. Solid-State Mater.*, 2023, 290, 116360.
- [S7] D. Dev, M. S. Shawkat, A. Krishnaprasad, Y. Jung and T. Roy, *IEEE Electron Device Lett.*, 2020, 41, 1440–1443.
- [S8] F. Luo, W. M. Zhong, X. G. Tang, J. Y. Chen, Y. P. Jiang and Q. X. Liu, *Nano Mater. Sci.*, 2024, 6, 68-76.
- [S9] D. Ju, J. H. Kim and S. Kim, *J. Alloys Compd.*, 2023, 961, 170920.
- [S10] M. C. Sahu, A. K. Jena, S. K. Mallik, S. Roy, S. Sahoo, R. S. Ajimsha, P. Misra and S. Sahoo, *ACS Appl. Mater. Interfaces*, 2023, 15, 25713–25725.
- [S11] P. Saha, M. Sahad E, S. Sathyanarayana and B. C. Das, *ACS Nano*, 2024, 18, 1137-1148.
- [S12] M. Kumar, J. Y. Park and H. Seo, *Small Methods*, 2021, 5, 2100566.
- [S13] E. Lee, J. Kim, J. Park, J. Hwang, H. Jang, K. Cho and W. Choi, *ACS Appl. Mater. Interfaces*, 2023, 15, 15839-15847.
- [S14] X. Chen, Y. Jin, Z. Tao, L. Jiang, X. Wu, Y. Xiao, B. Jiang, X. Wen, J. Zhang, M. Zhu and C. Ye, *IEEE Trans. Electron Devices*, 2023, 70, 1001–1005.
- [S15] K. Wang, L. Li, R. Zhao, J. Zhao, Z. Zhou, J. Wang, H. Wang, B. Tang, C. Lu, J. Lou, J. Chen and X. Yan, *Adv. Electron. Mater.*, 2020, 6, 1901342.
- [S16] A. Sokolov, M. Ali, H. Li, Y. R. Jeon, M. J. Ko and C. Choi, *Adv. Electron. Mater.*, 2021, 7, 2000866.
- [S17] Z. Wang, M. Yin, T. Zhang, Y. Cai, Y. Wang, Y. Yang and R. Huang, *Nanoscale*, 2016, 8, 14015–14022.
